# Supplementary material for: Hepatoprotective Activity of Ethanol Extract of Rice Solid-State Fermentation of Ganoderma tsugae against CCl4-Induced Acute Liver Injury in Mice
Source: MDPI journal article supplement (doi:10.3390/molecules27165347), 2022-08-22
Supplement: s1 [file s1]

Table S1. The results of response surface optimization test for G42 rice solid fermentation.

| Number | Factor and level      |               |                              | Triterpene content<br>(mg/g) |
|--------|-----------------------|---------------|------------------------------|------------------------------|
|        | A Temperature<br>(°C) | B Time<br>(d) | C Inoculation amount<br>(mL) |                              |
| 1      | 25                    | 40            | 30                           | 45.47                        |
| 2      | 30                    | 40            | 30                           | 49.59                        |
| 3      | 25                    | 50            | 30                           | 42.75                        |
| 4      | 30                    | 50            | 30                           | 47.36                        |
| 5      | 25                    | 45            | 20                           | 45.71                        |
| 6      | 30                    | 45            | 20                           | 49.68                        |
| 7      | 25                    | 45            | 25                           | 38.06                        |
| 8      | 30                    | 45            | 25                           | 40.32                        |
| 9      | 27                    | 40            | 20                           | 47.62                        |
| 10     | 27                    | 50            | 20                           | 46.26                        |
| 11     | 27                    | 40            | 25                           | 39.22                        |
| 12     | 27                    | 50            | 30                           | 38.84                        |
| 13     | 27                    | 45            | 25                           | 50.86                        |
| 14     | 27                    | 45            | 25                           | 51.21                        |
| 15     | 27                    | 45            | 25                           | 51.79                        |
| 16     | 27                    | 45            | 25                           | 50.92                        |
| 17     | 27                    | 45            | 50                           | 50.56                        |
