# Supplementary material for: Hepatoprotective Activity of Ethanol Extract of Rice Solid-State Fermentation of Ganoderma tsugae against CCl4-Induced Acute Liver Injury in Mice
Source: MDPI journal article supplement (doi:10.3390/molecules27165347), 2022-08-22
Supplement: s1 [file s1]

Table S3. The information of *Ganoderma* spp. strains used in this study

| Number | Strain name | Source             | Type       | Name                         |
|--------|-------------|--------------------|------------|------------------------------|
| G10    | CCMJ2444    | Heilongjiang China | Wild       | <i>Ganoderma tsugae</i>      |
| G12    | CCMJ2446    | Guizhou China      | Wild       | <i>Ganoderma tsugae</i>      |
| G17    | CCMJ2451    | Russia             | Cultivated | <i>Ganoderma tsugae</i>      |
| G20    | CCMJ2454    | Jilin China        | Cultivated | <i>Ganoderma tsugae</i>      |
| G27    | CCMJ2461    | Heilongjiang China | Cultivated | <i>Ganoderma tsugae</i>      |
| G40    | CCMJ2474    | Heilongjiang China | Wild       | <i>Ganoderma tsugae</i>      |
| G41    | CCMJ2475    | Jilin China        | Wild       | <i>Ganoderma tsugae</i>      |
| G42    | CCMJ2476    | Jilin China        | Wild       | <i>Ganoderma tsugae</i>      |
| G43    | CCMJ2477    | Jilin China        | Cultivated | <i>Ganoderma tsugae</i>      |
| G78    | CCMJ3025    | Zhejiang China     | Cultivated | <i>Ganoderma sichuanense</i> |
