# Supplementary material for: Hepatoprotective Activity of Ethanol Extract of Rice Solid-State Fermentation of Ganoderma tsugae against CCl4-Induced Acute Liver Injury in Mice
Source: MDPI journal article supplement (doi:10.3390/molecules27165347), 2022-08-22
Supplement: s1 [file s1]

Table S2. Differential compounds of rice before and after G42 rice solid fermentation.

| No. | RT/m<br>in | Component name                                          | Formula                                        | Theoretical<br>mass | [M-H] <sup>-</sup> | ppm  | MS/MS Fragments <sup>2</sup>   |
|-----|------------|---------------------------------------------------------|------------------------------------------------|---------------------|--------------------|------|--------------------------------|
| 1   | 2.43       | Beta-ethoxyethyl sebacate                               | C <sub>18</sub> H <sub>34</sub> O <sub>6</sub> | 346.2346            | 345.2273           | -2.7 | 229.1434,211.1330,18<br>3.1385 |
| 2   | 2.71       | 10-[2-(2-Butoxyethoxy)ethoxy]-10-oxodecanoic acid       | C <sub>18</sub> H <sub>34</sub> O <sub>6</sub> | 346.2346            | 345.2273           | -2.8 | 229.1441,211.1337,17<br>1.1018 |
| 3   | 8.67       | (10E,15Z)-9,12,13-Trihydroxy-10,15-octadecadienoic acid | C <sub>18</sub> H <sub>32</sub> O <sub>5</sub> | 328.2241            | 327.2168           | -2.6 | 229.1446,211.1328,17<br>1.1012 |
| 4   | 12.41      | 9,10,13-Trihydroxy-11-octadecenoic acid                 | C <sub>18</sub> H <sub>34</sub> O <sub>5</sub> | 330.24              | 329.2327           | -2   | 311.2225,211.1331,18<br>3.1384 |
| 5   | 12.79      | (9Z)-12,13,17-Trihydroxy-9-octadecenoic acid            | C <sub>18</sub> H <sub>34</sub> O <sub>5</sub> | 330.2399            | 329.2326           | -2.3 | 171.1018,139.1120,13<br>7.0966 |
| 6   | 13.09      | Sanleng acid                                            | C <sub>18</sub> H <sub>34</sub> O <sub>5</sub> | 330.24              | 329.2327           | -2   | 311.2209,229.1440,17<br>1.1019 |
| 7   | 15.85      | Sanleng acid isomer                                     | C <sub>18</sub> H <sub>34</sub> O <sub>5</sub> | 330.2398            | 329.2325           | -2.6 | 201.1129,171.1016              |
| 8   | 16.75      | 9,10,13-Trihydroxy-11-octadecenoic acid isomer          | C <sub>18</sub> H <sub>34</sub> O <sub>5</sub> | 330.2398            | 329.2325           | -2.5 | 201.1125,171.1018              |
| 9   | 17.46      | (-)-pinellic acid isomer                                | C <sub>18</sub> H <sub>34</sub> O <sub>5</sub> | 330.2398            | 329.2325           | -2.5 | 201.1122,171.1019,12<br>7.1120 |
| 10  | 17.81      | Platycodigenin                                          | C <sub>30</sub> H <sub>48</sub> O <sub>7</sub> | 520.3398            | 519.3325           | -0.4 | 501.3222,322.2145,26           |

|    |       |                                                                                                      |                                                                               |          |          |      |                                |
|----|-------|------------------------------------------------------------------------------------------------------|-------------------------------------------------------------------------------|----------|----------|------|--------------------------------|
|    |       |                                                                                                      |                                                                               |          |          |      | 1.1481                         |
| 11 | 18.58 | Cucurbitacin IIb                                                                                     | C <sub>30</sub> H <sub>48</sub> O <sub>7</sub>                                | 520.3399 | 519.3326 | -0.2 | 501.3221,322.2140,10<br>1.0600 |
| 12 | 22.59 | Ganolucidic acid B                                                                                   | C <sub>30</sub> H <sub>46</sub> O <sub>6</sub>                                | 502.3291 | 501.3219 | -0.6 | 483.3120,330.2202,13<br>7.0604 |
| 13 | 24.07 | (5R,6S,7R)-5-Amino-2,4,6,7-tetrahydroxy-3-henicosanone                                               | C <sub>21</sub> H <sub>43</sub> NO <sub>5</sub>                               | 389.3134 | 388.3062 | -1.8 | 267.2322,255.2322,22<br>5.2215 |
| 14 | 24.68 | O-(Hydroxy {(2R)-2-hydroxy-3-[(2-methoxy-14-methylpentadecyl)oxy]propoxy}phosphoryl)-L-serine isomer | C <sub>23</sub> H <sub>48</sub> NO <sub>9</sub> P                             | 513.3068 | 512.2996 | 0.3  | 452.2775,239.2014,22<br>7.2009 |
| 15 | 24.89 | 9,10-DiHODE                                                                                          | C <sub>18</sub> H <sub>32</sub> O <sub>4</sub>                                | 312.2294 | 311.2222 | -2   | 295.2268,277.2170,10<br>9.0651 |
| 16 | 25.01 | UNKONWN                                                                                              | C <sub>23</sub> H <sub>53</sub> N <sub>5</sub> O <sub>11</sub> P <sub>2</sub> | 637.3231 | 636.3158 | 2.2  |                                |
| 17 | 25.08 | 1-Myristoyl-2-hydroxy-sn-glycero-3-PE                                                                | C <sub>19</sub> H <sub>40</sub> NO <sub>7</sub> P                             | 425.2542 | 424.247  | 0    | 227.2011,196.0378,14<br>0.0109 |
| 18 | 25.18 | (9Z)-2-Hydroxy-17-oxo-9-octadecenoic acid                                                            | C <sub>18</sub> H <sub>32</sub> O <sub>4</sub>                                | 312.2296 | 311.2224 | -1.3 | 295.2265,279.2325,23<br>9.2007 |
| 19 | 25.24 | O-(Hydroxy {(2R)-2-hydroxy-3-[(2-methoxy-14-methylpentadecyl)oxy]propoxy}phosphoryl)-L-serine        | C <sub>23</sub> H <sub>48</sub> NO <sub>9</sub> P                             | 513.3069 | 512.2996 | 0.4  | 452.2785,363.1937,22<br>7.2009 |
| 20 | 25.37 | (11E,13E)-9,10-dihydroxy-11,13-octadecadienoic acid isomer-2                                         | C <sub>18</sub> H <sub>32</sub> O <sub>4</sub>                                | 312.2295 | 311.2222 | -1.8 | 171.1014,139.1116              |
| 21 | 25.63 | (2R)-1-{[(2-Aminoethoxy)(hydroxy)phosphoryl]oxy}-3-hydroxy-2-propanyl (9Z,12Z,15                     | C <sub>23</sub> H <sub>42</sub> NO <sub>7</sub> P                             | 475.2701 | 474.2628 | 0.5  | 277.2168,152.9952,78           |

|    |       |                                                                                                                                                          |                                                               |          |          |      |                             |
|----|-------|----------------------------------------------------------------------------------------------------------------------------------------------------------|---------------------------------------------------------------|----------|----------|------|-----------------------------|
|    |       | Z)-9,12,15-octadecatrienoate                                                                                                                             |                                                               |          |          |      | .9583                       |
| 22 | 25.78 | (2S)-2-Amino-3-[(hydroxy {[(2R,3R)-2- {[(9Z)-9-octadecenoyloxy]methyl}tetrahydro-2H-pyran-3-yl]oxy}phosphoryl)oxy]propanoic acid (non-preferred name)    | C <sub>27</sub> H <sub>50</sub> NO <sub>9</sub> P             | 563.3222 | 562.315  | -0.2 | 502.2946,277.2168,78.9584   |
| 23 | 25.83 | 1-Deoxy-1- {[(7R,18Z,21Z)-4,7-dihydroxy-4-oxido-10-oxo-3,5,9-trioxa-4lambda~5~-phosphaheptacos-18,21-dien-1-yl]amino} -beta-D-fructopyranose             | C <sub>29</sub> H <sub>54</sub> NO <sub>12</sub> P            | 639.339  | 638.3317 | 0.9  | 476.2789,279.2323,15.2.9953 |
| 24 | 26.31 | 1-Deoxy-1- {[(7R,17Z,20Z)-4-hydroxy-7-(hydroxymethyl)-4-oxido-9-oxo-3,5,8-trioxa-4lambda~5~-phosphahexacos-17,20-dien-1-yl]amino} -beta-D-fructopyranose | C <sub>29</sub> H <sub>54</sub> NO <sub>12</sub> P            | 639.3388 | 638.3315 | 0.7  | 476.2784,279.2324,15.2.9952 |
| 25 | 26.55 | 3- {[(2-Aminoethoxy)(hydroxy)phosphoryl]oxy} -2-hydroxypropyl (9Z,12Z)-9,12-octadecadienoate                                                             | C <sub>23</sub> H <sub>44</sub> NO <sub>7</sub> P             | 477.2855 | 476.2782 | -0.1 | 417.2384,279.2322,15.2.9950 |
| 26 | 26.57 | 1-Deoxy-1- {[(7R)-4,7-dihydroxy-4-oxido-10-oxo-3,5,9-trioxa-4lambda~5~-phosphapentacos-1-yl]amino} -beta-D-fructopyranose                                | C <sub>27</sub> H <sub>54</sub> NO <sub>12</sub> P            | 615.3385 | 614.3312 | 0.2  | 452.2778,255.2321,15.2.9950 |
| 27 | 26.7  | 1-[2-(4- {(E)-[4-(2- { [3-( {4-[(3-Aminopropyl)amino]butyl}amino)propyl]amino}ethoxy)phenyl]diazenyl}phenoxy)ethyl]-1H-pyrrole-2,5-dione                 | C <sub>30</sub> H <sub>43</sub> N <sub>7</sub> O <sub>4</sub> | 565.3381 | 564.3308 | 0.8  | 483.3110,279.2323           |
| 28 | 27    | 1- {[(2-Aminoethoxy)(hydroxy)phosphoryl]oxy} -3-hydroxy-2-propanyl (4Z,7Z)-4,7-octadecadienoate                                                          | C <sub>23</sub> H <sub>44</sub> NO <sub>7</sub> P             | 477.2857 | 476.2784 | 0.3  | 433.2354,279.2324,19.6.0373 |
| 29 | 27.11 | 1-Deoxy-1- {[(7R)-4-hydroxy-7-(hydroxymethyl)-4-oxido-9-oxo-3,5,8-trioxa-4lambda~5~-phosphatetracos-1-yl]amino} -beta-D-fructopyranose                   | C <sub>27</sub> H <sub>54</sub> NO <sub>12</sub> P            | 615.3389 | 614.3316 | 0.8  | 452.2785,255.2324,19.6.0373 |
| 30 | 27.15 | 1-[(9Z,12Z)-heptadecadienoyl]-sn-glycero-3-phosphocholine                                                                                                | C <sub>25</sub> H <sub>48</sub> NO <sub>7</sub> P             | 505.3170 | 504.3097 | 0.3  | 279.2324,224.0688,78.9583   |
| 31 | 27.15 | UNKONWN                                                                                                                                                  | C <sub>27</sub> H <sub>52</sub> NO <sub>9</sub> P             | 565.3381 | 564.3309 | 0.3  |                             |

|    |       |                                                                                                                         |                                                                              |          |          |      |                            |
|----|-------|-------------------------------------------------------------------------------------------------------------------------|------------------------------------------------------------------------------|----------|----------|------|----------------------------|
| 32 | 27.22 | 1-linoleoyl-sn-glycero-3-phospho-D-myo-inositol                                                                         | C <sub>27</sub> H <sub>49</sub> O <sub>12</sub> P                            | 596.2965 | 595.2893 | 0.6  | 333.0578,315.0480,241.0114 |
| 33 | 27.35 | 1-Palmitoyl-2-hydroxy-sn-glycero-3-PE                                                                                   | C <sub>21</sub> H <sub>44</sub> NO <sub>7</sub> P                            | 453.2856 | 452.2783 | 0.1  | 281.2474,255.2323,196.0373 |
| 34 | 27.88 | 2-hexadecanoyl-sn-glycero-3-phosphoethanolamine                                                                         | C <sub>16</sub> H <sub>41</sub> N <sub>9</sub> O <sub>2</sub> P <sub>2</sub> | 453.2854 | 452.2781 | -1   | 281.2479,255.2323,78.9583  |
| 35 | 28.02 | O-(Hydroxy {(2R)-2-hydroxy-3-[(2-methoxyoctadecyl)oxy]propoxy} phosphoryl)-L-serine isomer                              | C <sub>25</sub> H <sub>52</sub> NO <sub>9</sub> P                            | 541.3381 | 540.3308 | 0.2  | 480.3098,255.2325,224.0687 |
| 36 | 28.04 | 1-pentadecanoyl-sn-glycero-3-phosphocholine                                                                             | C <sub>23</sub> H <sub>48</sub> NO <sub>7</sub> P                            | 481.3167 | 480.3095 | -0.2 | 255.2323,224.0686,78.9583  |
| 37 | 28.22 | (2R)-2-Hydroxy-3-[(hydroxy {[ (1S,2R,3R,4S,5S,6R)-2,3,4,5,6-pentahydroxycyclohexyl]oxy} phosphoryl)oxy]propyl palmitate | C <sub>25</sub> H <sub>49</sub> O <sub>12</sub> P                            | 572.2960 | 571.2887 | -0.3 | 391.2249,281.2479,152.9951 |
| 38 | 28.35 | 9-HODE                                                                                                                  | C <sub>18</sub> H <sub>32</sub> O <sub>3</sub>                               | 296.2343 | 295.2270 | -2.8 | 277.2164,195.1376,113.0967 |
| 39 | 28.37 | O- {[ (2R)-3-(Henicosanoyloxy)-2-hydroxypropoxy] (hydroxy) phosphoryl } -L-serine                                       | C <sub>27</sub> H <sub>54</sub> NO <sub>9</sub> P                            | 567.3533 | 566.3460 | -0.5 | 506.3250,281.2478,168.0425 |
| 40 | 28.68 | 2-Aminoethyl 2-hydroxy-3- {[ (9E)-1-oxonio-9-octadecen-1-yl]oxy } propyl phosphate                                      | C <sub>23</sub> H <sub>46</sub> NO <sub>7</sub> P                            | 479.3013 | 478.2940 | 0.2  | 281.2479,140.0110,78.9583  |
| 41 | 28.84 | (2R)-2-Carboxy-2-(trimethylammonio)ethyl 2-methoxy-3- [(12-oxoheptadecyl)oxy]propyl phosphate                           | C <sub>27</sub> H <sub>54</sub> NO <sub>9</sub> P                            | 567.3536 | 566.3463 | -0.1 | 506.3256,281.2480,78.9583  |

|    |       |                                                                                                                                           |                                                   |          |          |      |                             |
|----|-------|-------------------------------------------------------------------------------------------------------------------------------------------|---------------------------------------------------|----------|----------|------|-----------------------------|
| 42 | 29.29 | 1-oleoyl-sn-glycero-3-phospho-D-myo-inositol                                                                                              | C <sub>27</sub> H <sub>51</sub> O <sub>12</sub> P | 598.3115 | 597.3043 | -0.4 | 281.2478,241.0112,96.9687   |
| 43 | 29.37 | 3-{[(2,3-Dihydroxypropoxy)(hydroxy)phosphoryl]oxy}-2-hydroxypropyl palmitate                                                              | C <sub>22</sub> H <sub>45</sub> O <sub>9</sub> P  | 484.2799 | 483.2726 | -0.4 | 255.2322,152.9951,78.9583   |
| 44 | 29.92 | (2R)-3-({[(2S)-2,3-Dihydroxypropoxy](hydroxy)phosphoryl]oxy}-2-hydroxypropyl palm itate                                                   | C <sub>22</sub> H <sub>45</sub> O <sub>9</sub> P  | 484.2802 | 483.2729 | 0.1  | 255.2326,152.9952,78.9583   |
| 45 | 31.48 | 1-(9Z-octadecenoyl)-sn-glycero-3-phospho-(1'-sn-glycerol)                                                                                 | C <sub>24</sub> H <sub>47</sub> O <sub>9</sub> P  | 510.2958 | 509.2885 | 0    | 281.2479,152.9952,78.9583   |
| 46 | 32.85 | Benzenepropanoic acid, 3-(1,1-dimethylethyl)-4-hydroxy-5-methyl-, 1,2-ethanediylbis(ox y-2,1-ethanediyl) ester                            | C <sub>34</sub> H <sub>50</sub> O <sub>8</sub>    | 586.3506 | 585.3434 | 0.1  | 367.2121,233.1024,14.9.0814 |
| 47 | 33.05 | (3alpha,5xi,12alpha,25S)-3-{{[(3S)-4-Carboxy-3-hydroxy-3-methylbutanoyl]oxy}-12-hyd roxy-24-methylenelanost-8-en-26-oic acid              | C <sub>37</sub> H <sub>58</sub> O <sub>8</sub>    | 630.4140 | 629.4068 | 1.4  | 485.3643,441.3740,10.1.0238 |
| 48 | 33.3  | Hexadecaneperoxoic acid                                                                                                                   | C <sub>16</sub> H <sub>32</sub> O <sub>3</sub>    | 272.2349 | 271.2276 | -1   | 225.2220,101.0237,57.0338   |
| 49 | 34.28 | (3S)-3-Hydroxy-5-{{[(3alpha,12alpha,23S)-12-hydroxy-24-methyl-26-oxo-23,26-epoxyla nosta-8,24-dien-3-yl]oxy}-3-methyl-5-oxopentanoic acid | C <sub>37</sub> H <sub>56</sub> O <sub>8</sub>    | 628.3982 | 627.3909 | 1.1  | 565.3902,525.3588,32.9.2482 |
| 50 | 34.46 | (3beta,12alpha,25S)-3-{{[(3S)-4-Carboxy-3-hydroxy-3-methylbutanoyl]oxy}-12-hydroxy- 24-methylenelanost-8-en-26-oic acid                   | C <sub>37</sub> H <sub>58</sub> O <sub>8</sub>    | 630.4139 | 629.4066 | 1.1  | 527.3743,441.3739,81.0338   |
| 51 | 34.66 | (3beta,12alpha,25S)-3-{{[(3S)-4-Carboxy-3-hydroxy-3-methylbutanoyl]oxy}-12-hydroxy- 24-methylenelanost-8-en-26-oic acid isomer            | C <sub>37</sub> H <sub>58</sub> O <sub>8</sub>    | 630.4137 | 629.4064 | 0.8  | 567.4060,441.3739,81.0338   |

|    |       |                                                                                                                                 |                                                |          |          |      |                            |
|----|-------|---------------------------------------------------------------------------------------------------------------------------------|------------------------------------------------|----------|----------|------|----------------------------|
| 52 | 34.76 | Methyl 3-acetoxy-27-hydroxylup-20(29)-en-28-oate                                                                                | C <sub>33</sub> H <sub>52</sub> O <sub>5</sub> | 528.3817 | 527.3744 | 0.4  | 465.3371,279.2324,277.2164 |
| 53 | 36.19 | (3alpha,5xi)-3-[(4-Carboxy-3-hydroxy-3-methylbutanoyl)oxy]-24-methylenelanost-8-en-21-oic acid                                  | C <sub>37</sub> H <sub>58</sub> O <sub>7</sub> | 614.4186 | 613.4114 | 0.6  | 551.4104,469.3687,101.0236 |
| 54 | 36.35 | 18-hydroxystearic acid                                                                                                          | C <sub>18</sub> H <sub>36</sub> O <sub>3</sub> | 300.266  | 299.2587 | -1.6 | 253.2531,251.2372,225.2209 |
| 55 | 36.83 | (3alpha,12alpha,25S)-12-Hydroxy-3-[(3-hydroxy-5-methoxy-3-methyl-5-oxopentanoyl)oxy]-24-methylenelanost-8-en-26-oic acid isomer | C <sub>38</sub> H <sub>60</sub> O <sub>8</sub> | 644.4297 | 643.4224 | 1.3  | 525.3954,441.3741,83.0131  |
| 56 | 38.72 | Methyl 2-(hydroxymethyl)octadecanoate                                                                                           | C <sub>20</sub> H <sub>40</sub> O <sub>3</sub> | 328.2970 | 327.2898 | -2.1 | 281.2842,277.2529,253.2528 |
